# Supplementary material for: TgA86 mouse model demonstrated potential markers for Bone Formation in Spondyloarthritis through ROS Detoxification, Folate Metabolism, and Inositol Phosphate Metabolism
Source: Research Square preprint supplement (doi:10.21203/rs.3.rs-7116883/v1), 2025-07-30
Supplement: Supplementary file 1 [file 17a1b1e8199a7916f0167868.xlsx]

## Sheet: Table 1
name	ES	fdr_qvalue	fwer_qvalue	gs_size	NES	pvalue	selected
GOBP_POSITIVE_REGULATION_OF_CELL_ADHESION	0.3831	0	0	518	2.7361	0	TRUE
GOBP_CELL_ACTIVATION_INVOLVED_IN_IMMUNE_RESPONSE	0.3807	0.0006	0.003	340	2.6708	0	TRUE
GOBP_POSITIVE_REGULATION_OF_INTERLEUKIN_1_PRODUCTION	0.61	0.0076	0.193	70	2.293	0	TRUE
GOBP_MRNA_METABOLIC_PROCESS	-0.4429	0.0018	0.037	747	-2.4743	0	TRUE
GOBP_POSITIVE_REGULATION_OF_INTERLEUKIN_1_BETA_PRODUCTION	0.61	0.0042	0.089	58	2.371	0	TRUE
GOBP_ACTIVATION_OF_INNATE_IMMUNE_RESPONSE	0.4226	0.0005	0.003	309	2.6674	0	TRUE
GOBP_POSITIVE_REGULATION_OF_DEFENSE_RESPONSE	0.3202	0.0045	0.089	511	2.3746	0	TRUE
GOBP_POSITIVE_REGULATION_OF_CELL_CELL_ADHESION	0.3792	0.0012	0.008	330	2.6197	0	TRUE
GOBP_NEGATIVE_REGULATION_OF_IMMUNE_EFFECTOR_PROCESS	0.4539	0.0042	0.073	142	2.3981	0	TRUE
GOBP_LEUKOCYTE_MIGRATION	0.3277	0.0043	0.066	395	2.4089	0	TRUE
GOBP_REGULATION_OF_INNATE_IMMUNE_RESPONSE	0.3285	0.0051	0.115	463	2.3531	0.0023	TRUE
GOBP_DNA_DAMAGE_RESPONSE	-0.3982	0.0005	0.004	892	-2.6391	0	TRUE
GOBP_CELL_CYCLE_PROCESS	-0.3066	0.0075	0.236	1298	-2.2644	0	TRUE
GOBP_MONONUCLEAR_CELL_MIGRATION	0.4155	0.0042	0.075	218	2.3937	0	TRUE
GOBP_POSITIVE_REGULATION_OF_RESPONSE_TO_BIOTIC_STIMULUS	0.361	0.0023	0.024	406	2.5012	0	TRUE
GOBP_INNATE_IMMUNE_RESPONSE_ACTIVATING_SIGNALING_PATHWAY	0.3996	0.0031	0.037	273	2.4653	0	TRUE
GOBP_PRODUCTION_OF_MOLECULAR_MEDIATOR_OF_IMMUNE_RESPONSE	0.3699	0.0077	0.198	400	2.2901	0	TRUE
GOBP_CYTOKINE_PRODUCTION_INVOLVED_IN_IMMUNE_RESPONSE	0.4662	0.0045	0.096	154	2.3657	0	TRUE
GOBP_INTERLEUKIN_1_PRODUCTION	0.5012	0.0063	0.149	122	2.3291	0	TRUE
GOBP_T_CELL_ACTIVATION_INVOLVED_IN_IMMUNE_RESPONSE	0.4453	0.0075	0.183	137	2.3021	0.0023	TRUE
GOBP_POSITIVE_REGULATION_OF_LOCOMOTION	0.3521	0.0006	0.002	656	2.7159	0	TRUE
GOBP_LEUKOCYTE_CELL_CELL_ADHESION	0.3525	0.0024	0.023	426	2.5158	0	TRUE
GOBP_MYELOID_LEUKOCYTE_MEDIATED_IMMUNITY	0.4237	0.0083	0.222	128	2.279	0.0023	TRUE
GOBP_MRNA_PROCESSING	-0.5084	0.0054	0.165	499	-2.3123	0	TRUE
GOBP_ACTIVATION_OF_IMMUNE_RESPONSE	0.3572	0.0007	0.003	565	2.6711	0	TRUE
GOBP_REGULATION_OF_CELL_CELL_ADHESION	0.3479	0.0022	0.019	507	2.5464	0	TRUE
GOBP_TETRAPYRROLE_BIOSYNTHETIC_PROCESS	-0.6376	0.0053	0.15	31	-2.3212	0	TRUE
GOBP_MYELOID_LEUKOCYTE_ACTIVATION	0.3511	0.0044	0.089	278	2.3721	0.0024	TRUE
GOBP_REGULATION_OF_IMMUNE_EFFECTOR_PROCESS	0.3668	0.0005	0.002	465	2.6927	0	TRUE
GOBP_POSITIVE_REGULATION_OF_RESPONSE_TO_EXTERNAL_STIMULUS	0.3103	0.003	0.037	656	2.4612	0	TRUE
GOBP_LYMPHOCYTE_ACTIVATION	0.2863	0.0044	0.072	897	2.3992	0	TRUE
GOBP_LEUKOCYTE_MEDIATED_IMMUNITY	0.324	0.0037	0.05	585	2.4397	0	TRUE
GOBP_RNA_PROCESSING	-0.4051	0.0044	0.111	931	-2.3519	0.0017	TRUE
GOBP_DNA_REPAIR	-0.5236	0.0003	0.001	593	-2.766	0	TRUE
GOBP_PORPHYRIN_CONTAINING_COMPOUND_METABOLIC_PROCESS	-0.6387	0.0017	0.04	44	-2.461	0	TRUE
GOBP_IMMUNE_RESPONSE_REGULATING_SIGNALING_PATHWAY	0.3339	0.0034	0.044	497	2.4464	0	TRUE
GOBP_RIBONUCLEOPROTEIN_COMPLEX_BIOGENESIS	-0.5856	0.0044	0.119	436	-2.3459	0	TRUE
GOBP_POSITIVE_REGULATION_OF_LEUKOCYTE_CELL_CELL_ADHESION	0.3647	0.0082	0.229	278	2.2739	0	TRUE
GOBP_CHROMOSOME_SEGREGATION	-0.5083	0.002	0.031	419	-2.4948	0	TRUE
GOBP_REGULATION_OF_CELL_CYCLE	-0.3231	0.0075	0.246	1093	-2.259	0	TRUE
GOBP_HEME_METABOLIC_PROCESS	-0.6849	0.0024	0.056	37	-2.417	0	TRUE
GOBP_REGULATION_OF_LEUKOCYTE_MIGRATION	0.4201	0.0021	0.017	247	2.551	0	TRUE
GOBP_DNA_METABOLIC_PROCESS	-0.4207	0	0	977	-2.8803	0	TRUE
GOBP_ADAPTIVE_IMMUNE_RESPONSE	0.3613	0	0	630	2.8374	0	TRUE
GOBP_TETRAPYRROLE_METABOLIC_PROCESS	-0.6387	0.0016	0.022	53	-2.5125	0	TRUE
GOBP_CELL_CELL_ADHESION	0.3436	0	0	900	2.9141	0	TRUE
GOBP_CHROMOSOME_ORGANIZATION	-0.4759	0.0007	0.007	579	-2.5913	0	TRUE
GOBP_REGULATION_OF_CELL_ADHESION	0.3389	0.0005	0.003	821	2.6643	0	TRUE
GOBP_T_CELL_ACTIVATION	0.3127	0.0044	0.082	642	2.3873	0	TRUE
GOBP_REGULATION_OF_CYTOKINE_PRODUCTION_INVOLVED_IN_IMMUNE_RESPONSE	0.4655	0.0062	0.142	130	2.3335	0	TRUE
GOBP_INTERLEUKIN_1_BETA_PRODUCTION	0.5497	0.0041	0.061	101	2.4188	0	TRUE
GOBP_ADAPTIVE_IMMUNE_RESPONSE_BASED_ON_SOMATIC_RECOMBINATION_OF_IMMUNE_RECEPTORS_BUILT_FROM_IMMUNOGLOBULIN_SUPERFAMILY_DOMAINS	0.3481	0.002	0.015	484	2.5629	0	TRUE
GOBP_CELL_KILLING	0.4172	0.0044	0.085	277	2.381	0	TRUE
GOBP_TAXIS	0.3329	0.005	0.109	461	2.3562	0	TRUE

## Sheet: Table 2
name	ES	fdr_qvalue	fwer_qvalue	gs_size	NES	pvalue	selected
GOBP_POSITIVE_REGULATION_OF_CELL_ADHESION	0.4011	0.0003	0.001	518	2.9053	0	TRUE
GOBP_NEGATIVE_REGULATION_OF_MITOTIC_CELL_CYCLE_PHASE_TRANSITION	-0.5075	0.0086	0.63	186	-2.1158	0.0041	TRUE
GOBP_REGULATION_OF_IMMUNE_RESPONSE	0.3168	0.0008	0.008	986	2.6603	0	TRUE
GOBP_SISTER_CHROMATID_SEGREGATION	-0.4122	0.0086	0.647	222	-2.1105	0.0021	TRUE
GOBP_TELOMERE_ORGANIZATION	-0.5679	0.0027	0.171	153	-2.3294	0	TRUE
GOBP_MITOTIC_NUCLEAR_DIVISION	-0.4204	0.003	0.206	270	-2.2966	0.0021	TRUE
GOBP_CELL_JUNCTION_ASSEMBLY	0.4573	0.0007	0.006	531	2.6966	0	TRUE
GOBP_CELL_CYCLE_PROCESS	-0.4031	0	0	1298	-3.4775	0	TRUE
GOBP_RNA_CATABOLIC_PROCESS	-0.4497	0.0028	0.17	302	-2.331	0.0021	TRUE
GOBP_CELL_CYCLE_CHECKPOINT_SIGNALING	-0.5115	0.0051	0.383	209	-2.209	0	TRUE
GOBP_REGULATION_OF_NEUROGENESIS	0.3766	0.0084	0.34	484	2.2349	0	TRUE
GOBP_MRNA_CATABOLIC_PROCESS	-0.4794	0.0035	0.245	255	-2.277	0	TRUE
GOBP_CELL_DIVISION	-0.3791	0	0	637	-2.7786	0	TRUE
GOBP_MICROTUBULE_ORGANIZING_CENTER_ORGANIZATION	-0.6006	0.0009	0.04	151	-2.5066	0	TRUE
GOBP_SMOOTH_MUSCLE_CELL_PROLIFERATION	0.5749	0.0038	0.116	202	2.3696	0.002	TRUE
GOBP_POSITIVE_REGULATION_OF_LOCOMOTION	0.4205	0	0	656	3.2604	0	TRUE
GOBP_LEUKOCYTE_CELL_CELL_ADHESION	0.33	0.0047	0.169	426	2.3253	0	TRUE
GOBP_MAPK_CASCADE	0.3413	0.0008	0.011	819	2.6167	0	TRUE
GOBP_MEIOTIC_CELL_CYCLE_PROCESS	-0.4834	0.007	0.505	241	-2.16	0	TRUE
GOBP_GENERATION_OF_NEURONS	0.2946	0.0019	0.046	1737	2.4759	0	TRUE
GOBP_REGULATION_OF_CELL_CYCLE_PROCESS	-0.4194	0	0	758	-2.9588	0	TRUE
GOBP_MRNA_PROCESSING	-0.4801	0	0	499	-2.8656	0	TRUE
GOBP_REGULATION_OF_PEPTIDYL_TYROSINE_PHOSPHORYLATION	0.5033	0.0001	0.001	251	2.7767	0	TRUE
GOBP_REGULATION_OF_CELL_ACTIVATION	0.2998	0.0067	0.256	658	2.2765	0	TRUE
GOBP_CELL_CHEMOTAXIS	0.4166	0.0012	0.022	329	2.5536	0	TRUE
GOBP_MICROTUBULE_CYTOSKELETON_ORGANIZATION_INVOLVED_IN_MITOSIS	-0.5651	0.0009	0.042	160	-2.498	0	TRUE
GOBP_REGULATION_OF_CELL_CELL_ADHESION	0.3402	0.0035	0.106	507	2.3832	0	TRUE
GOBP_TETRAPYRROLE_BIOSYNTHETIC_PROCESS	-0.5393	0.0051	0.381	31	-2.2097	0.002	TRUE
GOBP_DNA_REPLICATION	-0.5109	0	0	270	-3.0575	0	TRUE
GOBP_NEGATIVE_REGULATION_OF_CELL_CYCLE_PROCESS	-0.5298	0.0001	0.004	317	-2.7106	0	TRUE
GOBP_IMMUNE_EFFECTOR_PROCESS	0.3572	0.0002	0.001	851	2.9017	0	TRUE
GOBP_REGULATION_OF_CELL_JUNCTION_ASSEMBLY	0.468	0.0074	0.285	290	2.2626	0	TRUE
GOBP_PEPTIDYL_TYROSINE_MODIFICATION	0.5064	0.0002	0.001	307	2.8012	0	TRUE
GOBP_REGULATION_OF_CELL_CYCLE_PHASE_TRANSITION	-0.4349	0.0009	0.041	457	-2.503	0.0021	TRUE
GOBP_NEGATIVE_REGULATION_OF_CELL_CYCLE	-0.4237	0.0028	0.161	404	-2.3353	0	TRUE
GOBP_DNA_TEMPLATED_DNA_REPLICATION	-0.5215	0.0004	0.016	149	-2.5935	0	TRUE
GOBP_SPHINGOLIPID_METABOLIC_PROCESS	0.5756	0.0041	0.148	145	2.3432	0.0019	TRUE
GOBP_RECOMBINATIONAL_REPAIR	-0.4809	0.0082	0.579	181	-2.1311	0.0021	TRUE
GOBP_CELL_PROJECTION_MORPHOGENESIS	0.363	0.002	0.051	762	2.462	0	TRUE
GOBP_CHROMOSOME_SEGREGATION	-0.4315	0.0007	0.028	419	-2.5413	0	TRUE
GOBP_MICROTUBULE_CYTOSKELETON_ORGANIZATION	-0.454	0	0	665	-2.9605	0	TRUE
GOBP_MEIOTIC_CELL_CYCLE	-0.4565	0.0044	0.312	351	-2.2454	0	TRUE
GOBP_NEURON_DEVELOPMENT	0.3078	0.0013	0.026	1358	2.5396	0	TRUE
GOBP_DNA_METABOLIC_PROCESS	-0.3365	0	0	977	-2.7723	0	TRUE
GOBP_ACUTE_INFLAMMATORY_RESPONSE	0.5316	0.0076	0.307	111	2.2518	0	TRUE
GOBP_CELL_SUBSTRATE_ADHESION	0.4598	0.0004	0.001	369	2.9113	0	TRUE
GOBP_CELL_SUBSTRATE_JUNCTION_ORGANIZATION	0.5917	0.0039	0.121	105	2.368	0	TRUE
GOBP_NUCLEAR_CHROMOSOME_SEGREGATION	-0.3937	0.0093	0.683	317	-2.0925	0	TRUE
GOBP_SPINDLE_ASSEMBLY	-0.5741	0.0026	0.147	124	-2.3472	0	TRUE
GOBP_CHROMOSOME_ORGANIZATION	-0.4408	0	0	579	-3.0052	0	TRUE
GOBP_ERK1_AND_ERK2_CASCADE	0.4576	0.0009	0.01	356	2.6355	0	TRUE
GOBP_MITOTIC_SISTER_CHROMATID_SEGREGATION	-0.4446	0.0092	0.678	181	-2.0971	0	TRUE
GOBP_REGULATION_OF_MITOTIC_CELL_CYCLE_PHASE_TRANSITION	-0.4557	0.0003	0.01	350	-2.6304	0	TRUE
GOBP_AMIDE_METABOLIC_PROCESS	0.3618	0.0091	0.371	426	2.2201	0	TRUE
GOBP_MITOTIC_CELL_CYCLE	-0.4102	0	0	880	-3.2522	0	TRUE
GOBP_ADAPTIVE_IMMUNE_RESPONSE_BASED_ON_SOMATIC_RECOMBINATION_OF_IMMUNE_RECEPTORS_BUILT_FROM_IMMUNOGLOBULIN_SUPERFAMILY_DOMAINS	0.3682	0.0018	0.042	484	2.484	0	TRUE
GOBP_MITOTIC_CELL_CYCLE_PHASE_TRANSITION	-0.4611	0	0	446	-2.7895	0	TRUE
GOBP_CELL_KILLING	0.4107	0.0044	0.156	277	2.3342	0	TRUE
GOBP_POSITIVE_REGULATION_OF_INTRACELLULAR_SIGNAL_TRANSDUCTION	0.2952	0.0023	0.066	1096	2.4377	0	TRUE
GOBP_NUCLEIC_ACID_CATABOLIC_PROCESS	-0.3899	0.003	0.209	687	-2.2942	0	TRUE
GOBP_POSITIVE_REGULATION_OF_MITOTIC_CELL_CYCLE_PHASE_TRANSITION	-0.6265	0.0027	0.161	99	-2.335	0	TRUE
GOBP_RNA_SPLICING_VIA_TRANSESTERIFICATION_REACTIONS	-0.4557	0.0017	0.086	313	-2.4124	0	TRUE
GOBP_AXON_DEVELOPMENT	0.4224	0.0013	0.021	575	2.5583	0	TRUE
GOBP_MICROTUBULE_BASED_PROCESS	-0.3182	0.003	0.196	990	-2.3044	0	TRUE
GOBP_POSITIVE_REGULATION_OF_LEUKOCYTE_MIGRATION	0.4406	0.0086	0.34	172	2.235	0.0019	TRUE
GOBP_RNA_SPLICING	-0.4093	0.0012	0.061	458	-2.4652	0	TRUE
GOBP_ORGANELLE_FISSION	-0.4311	0.0001	0.004	510	-2.7332	0	TRUE
GOBP_CELL_CYCLE_G1_S_PHASE_TRANSITION	-0.4433	0.0079	0.551	247	-2.1408	0.0021	TRUE
GOBP_ORGANIC_CYCLIC_COMPOUND_CATABOLIC_PROCESS	-0.3142	0.0087	0.628	613	-2.1167	0	TRUE
GOBP_MRNA_METABOLIC_PROCESS	-0.4678	0	0	747	-3.176	0	TRUE
GOBP_REGULATION_OF_MITOTIC_CELL_CYCLE	-0.3328	0.0079	0.559	520	-2.1383	0.002	TRUE
GOBP_POSITIVE_REGULATION_OF_DEFENSE_RESPONSE	0.3473	0.0049	0.184	511	2.3161	0	TRUE
GOBP_LEUKOCYTE_MIGRATION	0.3936	0.0009	0.012	395	2.6032	0	TRUE
GOBP_SMOOTH_MUSCLE_CELL_MIGRATION	0.5499	0.0076	0.307	120	2.2531	0	TRUE
GOBP_POSITIVE_REGULATION_OF_MAPK_CASCADE	0.3566	0.003	0.087	534	2.4118	0	TRUE
GOBP_REGULATION_OF_CHEMOTAXIS	0.4372	0.007	0.267	224	2.2699	0	TRUE
GOBP_MONONUCLEAR_CELL_MIGRATION	0.5032	0.0009	0.009	218	2.6421	0	TRUE
GOBP_POSITIVE_REGULATION_OF_CELL_DEVELOPMENT	0.3459	0.0015	0.035	566	2.5017	0	TRUE
GOBP_POSITIVE_REGULATION_OF_ERK1_AND_ERK2_CASCADE	0.4548	0.0063	0.234	224	2.2876	0	TRUE
GOBP_CELL_MATRIX_ADHESION	0.4827	0.0008	0.01	238	2.6284	0	TRUE
GOBP_MITOTIC_SPINDLE_ORGANIZATION	-0.5774	0.003	0.199	127	-2.3006	0.0021	TRUE
GOBP_CELL_JUNCTION_ORGANIZATION	0.3741	0.0005	0.004	910	2.744	0	TRUE
GOBP_LYMPHOCYTE_MEDIATED_IMMUNITY	0.3695	0.0014	0.026	468	2.547	0	TRUE
GOBP_REGULATION_OF_RESPONSE_TO_EXTERNAL_STIMULUS	0.3141	0.0009	0.008	1121	2.6656	0	TRUE
GOBP_POSITIVE_REGULATION_OF_RESPONSE_TO_EXTERNAL_STIMULUS	0.3548	0.0013	0.021	656	2.5602	0	TRUE
GOBP_POSITIVE_REGULATION_OF_IMMUNE_RESPONSE	0.3317	0.0012	0.017	789	2.5725	0	TRUE
GOBP_LYMPHOCYTE_ACTIVATION	0.3022	0.0041	0.133	897	2.3568	0	TRUE
GOBP_LEUKOCYTE_MEDIATED_IMMUNITY	0.3506	0.0011	0.017	585	2.5688	0	TRUE
GOBP_CELL_MORPHOGENESIS_INVOLVED_IN_NEURON_DIFFERENTIATION	0.3966	0.0015	0.032	687	2.5091	0	TRUE
GOBP_RNA_PROCESSING	-0.4066	0.0002	0.007	931	-2.6608	0	TRUE
GOBP_DNA_REPAIR	-0.423	0	0	593	-2.9381	0	TRUE
GOBP_POSITIVE_REGULATION_OF_PEPTIDYL_TYROSINE_PHOSPHORYLATION	0.5538	0.0012	0.021	176	2.5578	0	TRUE
GOBP_PORPHYRIN_CONTAINING_COMPOUND_METABOLIC_PROCESS	-0.5409	0.0022	0.119	44	-2.3807	0	TRUE
GOBP_REGULATION_OF_MRNA_METABOLIC_PROCESS	-0.4461	0.0007	0.026	313	-2.5459	0	TRUE
GOBP_MEMBRANE_LIPID_METABOLIC_PROCESS	0.5856	0.0019	0.048	196	2.4689	0	TRUE
GOBP_DNA_REPLICATION_INITIATION	-0.629	0.0046	0.342	33	-2.2294	0	TRUE
GOBP_POSITIVE_REGULATION_OF_CELL_SUBSTRATE_ADHESION	0.5546	0.0046	0.17	142	2.3237	0	TRUE
GOBP_NEURON_PROJECTION_GUIDANCE	0.5613	0.0041	0.143	256	2.3455	0	TRUE
GOBP_REGULATION_OF_CELL_CYCLE	-0.3624	0	0	1093	-3.0046	0	TRUE
GOBP_REGULATION_OF_NERVOUS_SYSTEM_DEVELOPMENT	0.3578	0.0064	0.239	590	2.2829	0	TRUE
GOBP_REGULATION_OF_CELL_SUBSTRATE_ADHESION	0.5131	0.0009	0.011	230	2.6175	0	TRUE
GOBP_DNA_INTEGRITY_CHECKPOINT_SIGNALING	-0.5561	0.0083	0.598	137	-2.125	0.002	TRUE
GOBP_HEME_METABOLIC_PROCESS	-0.543	0.0045	0.324	37	-2.2395	0.002	TRUE
GOBP_ADAPTIVE_IMMUNE_RESPONSE	0.3722	0.0002	0.001	630	2.78	0	TRUE
GOBP_SYNAPSE_ORGANIZATION	0.3947	0.0015	0.036	630	2.4971	0	TRUE
GOBP_TETRAPYRROLE_METABOLIC_PROCESS	-0.5409	0.0022	0.122	53	-2.3794	0	TRUE
GOBP_REGULATION_OF_CELL_MATRIX_ADHESION	0.5722	0.004	0.134	130	2.3553	0.002	TRUE
GOBP_INFLAMMATORY_RESPONSE	0.2961	0.0014	0.029	830	2.5126	0	TRUE
GOBP_CELL_CYCLE_PHASE_TRANSITION	-0.4309	0	0	556	-2.7677	0	TRUE
GOBP_CELL_CELL_ADHESION	0.3597	0.0002	0.001	900	2.8441	0	TRUE
GOBP_POSITIVE_REGULATION_OF_CELL_CYCLE_PHASE_TRANSITION	-0.5639	0.0053	0.405	119	-2.2005	0	TRUE
GOBP_REGULATION_OF_CELL_ADHESION	0.392	0	0	821	3.1402	0	TRUE
GOBP_T_CELL_ACTIVATION	0.3188	0.0048	0.177	642	2.3196	0.0018	TRUE
GOBP_SPINDLE_ORGANIZATION	-0.577	0.0001	0.004	194	-2.7115	0	TRUE
GOBP_REGULATION_OF_CHROMOSOME_ORGANIZATION	-0.4262	0.0052	0.381	247	-2.2116	0.0021	TRUE
GOBP_DOUBLE_STRAND_BREAK_REPAIR	-0.4289	0.0029	0.186	306	-2.3135	0	TRUE
GOBP_TAXIS	0.4533	0	0	461	3.1138	0	TRUE

## Sheet: Table 3
	Metabolic level (based on metabolic flux simulation)		Transcriptional level (based on RNA-sequence)
Reaction	Pathway	P value	Gene Symbol	P value	adjusted P value
ACNAM9PL	Aminosugar Metabolism	0.006778	Nans	1.92e-05	0.00198182
ACNAM9PL2		0.006778		1.92e-05	0.00198182
GTHPi	Glutathione Metabolism	0.025738	Gpx1	3.1e-06	0.000582463
			Prdx2	7.87e-05	0.00512101
NACHEX27ly	Hyaluronan Metabolism	0.006778	Hexb	0.00075698	0.0239199
NACHEX10ly ~ NACHEX22ly	Keratan sulfate degradation	0.006778		0.00075698	0.0239199
NACHEXA9ly ~ NACHEXA19ly		0.006016		0.00075698	0.0239199
NNATr_copy1	NAD Metabolism	0.0027	Enpp2	3.65e-08	2.84e-05
NNATr_copy2		0.006778		3.65e-08	2.84e-05
DNADDP				3.65e-08	2.84e-05
B_MANNASEly	N-Glycan Biosynthesis	0.006778	Manba	0.0182372	0.163564
NADH2_u10m	Oxidative Phosphorylation	0.006222	Ndufs3	0.0475255	0.278719
			Ndufb5	0.0174536	0.159997
AACOAT	Propanoate Metabolism	0.028591	Aacs	0.0223706	0.183003
SPODMe	ROS Detoxification	0.027447	Sod3	0.0283557	0.212283
MI14PP	Inositol Phosphate Metabolism	0.011474	Inpp1	0.0221504	0.181952
13DAMPPOX	beta-Alanine metabolism	0.018976	Aoc3	0.0260517	0.201432
BAMPPALDOX		0.018976	Aldh1a1	0.00663496	0.087794
			Aldh3a2	0.00556601	0.0803689
			Aldh9a1	0.0304613	0.220674
ITCOALm	C5-Branched dibasic acid metabolism	0.044988	Sucla2	0.046946	0.27746
CDIPTr	Glycerophospholipid Metabolism	0.011474	Cdipt	0.0177578	0.161327
MHISOR	Histidine Metabolism	0.010367	Aoc3	0.0260517	0.201432
NACHEX27ly	Hyaluronan Metabolism	0.006778	Hexa	0.00368029	0.0647608
NACHEX10ly ~ NACHEX22ly	Keratan sulfate degradation	0.006016		0.00368029	0.0647608
NACHEXA9ly ~ NACHEXA19ly
ICDHyr	Citric Acid Cycle	0.072766	Idh1	0.000221012	0.0103813
Htm	Transport, Mitochondrial	0.072766	Ucp2	8.88e-05	0.00552964
PGS	Eicosanoid Metabolism	0.078598	Ptgs2	0.0209067	0.17521
PGSr		0.087431		0.0209067	0.17521
MTHFD	Folate Metabolism	0.083098	Mthfd1	0.00823473	0.100719
M4BTAer	Glycosylphosphatidylinositol (GPI)-anchor biosynthesis	0.049168	Pigu	0.0402979	0.253845
MM6ag	N-Glycan Biosynthesis	0.065226	Man1c1	0.0171853	0.158756
MM7Ag				0.0171853	0.158756
NDPK9	Nucleotides	0.0601	Nme3	0.00858369	0.103084
DUTPDPn		0.069495	Dut	0.019765	0.169159
SPODM	ROS Detoxification	0.078598	Sod1	0.0449098	0.271064
SPODMx		0.087431		0.0449098	0.271064
TRIODTHYSULT	Tyrosine metabolism	0.071861	Sult1a1	0.0451715	0.271608
